# Supplementary material for: SLC7A11 Reduces Laser-Induced Choroidal Neovascularization by Inhibiting RPE Ferroptosis and VEGF Production
Source: PubMed Central journal article supplement (PMC7930391; doi:10.3389/fcell.2021.639851), 2021-02-18

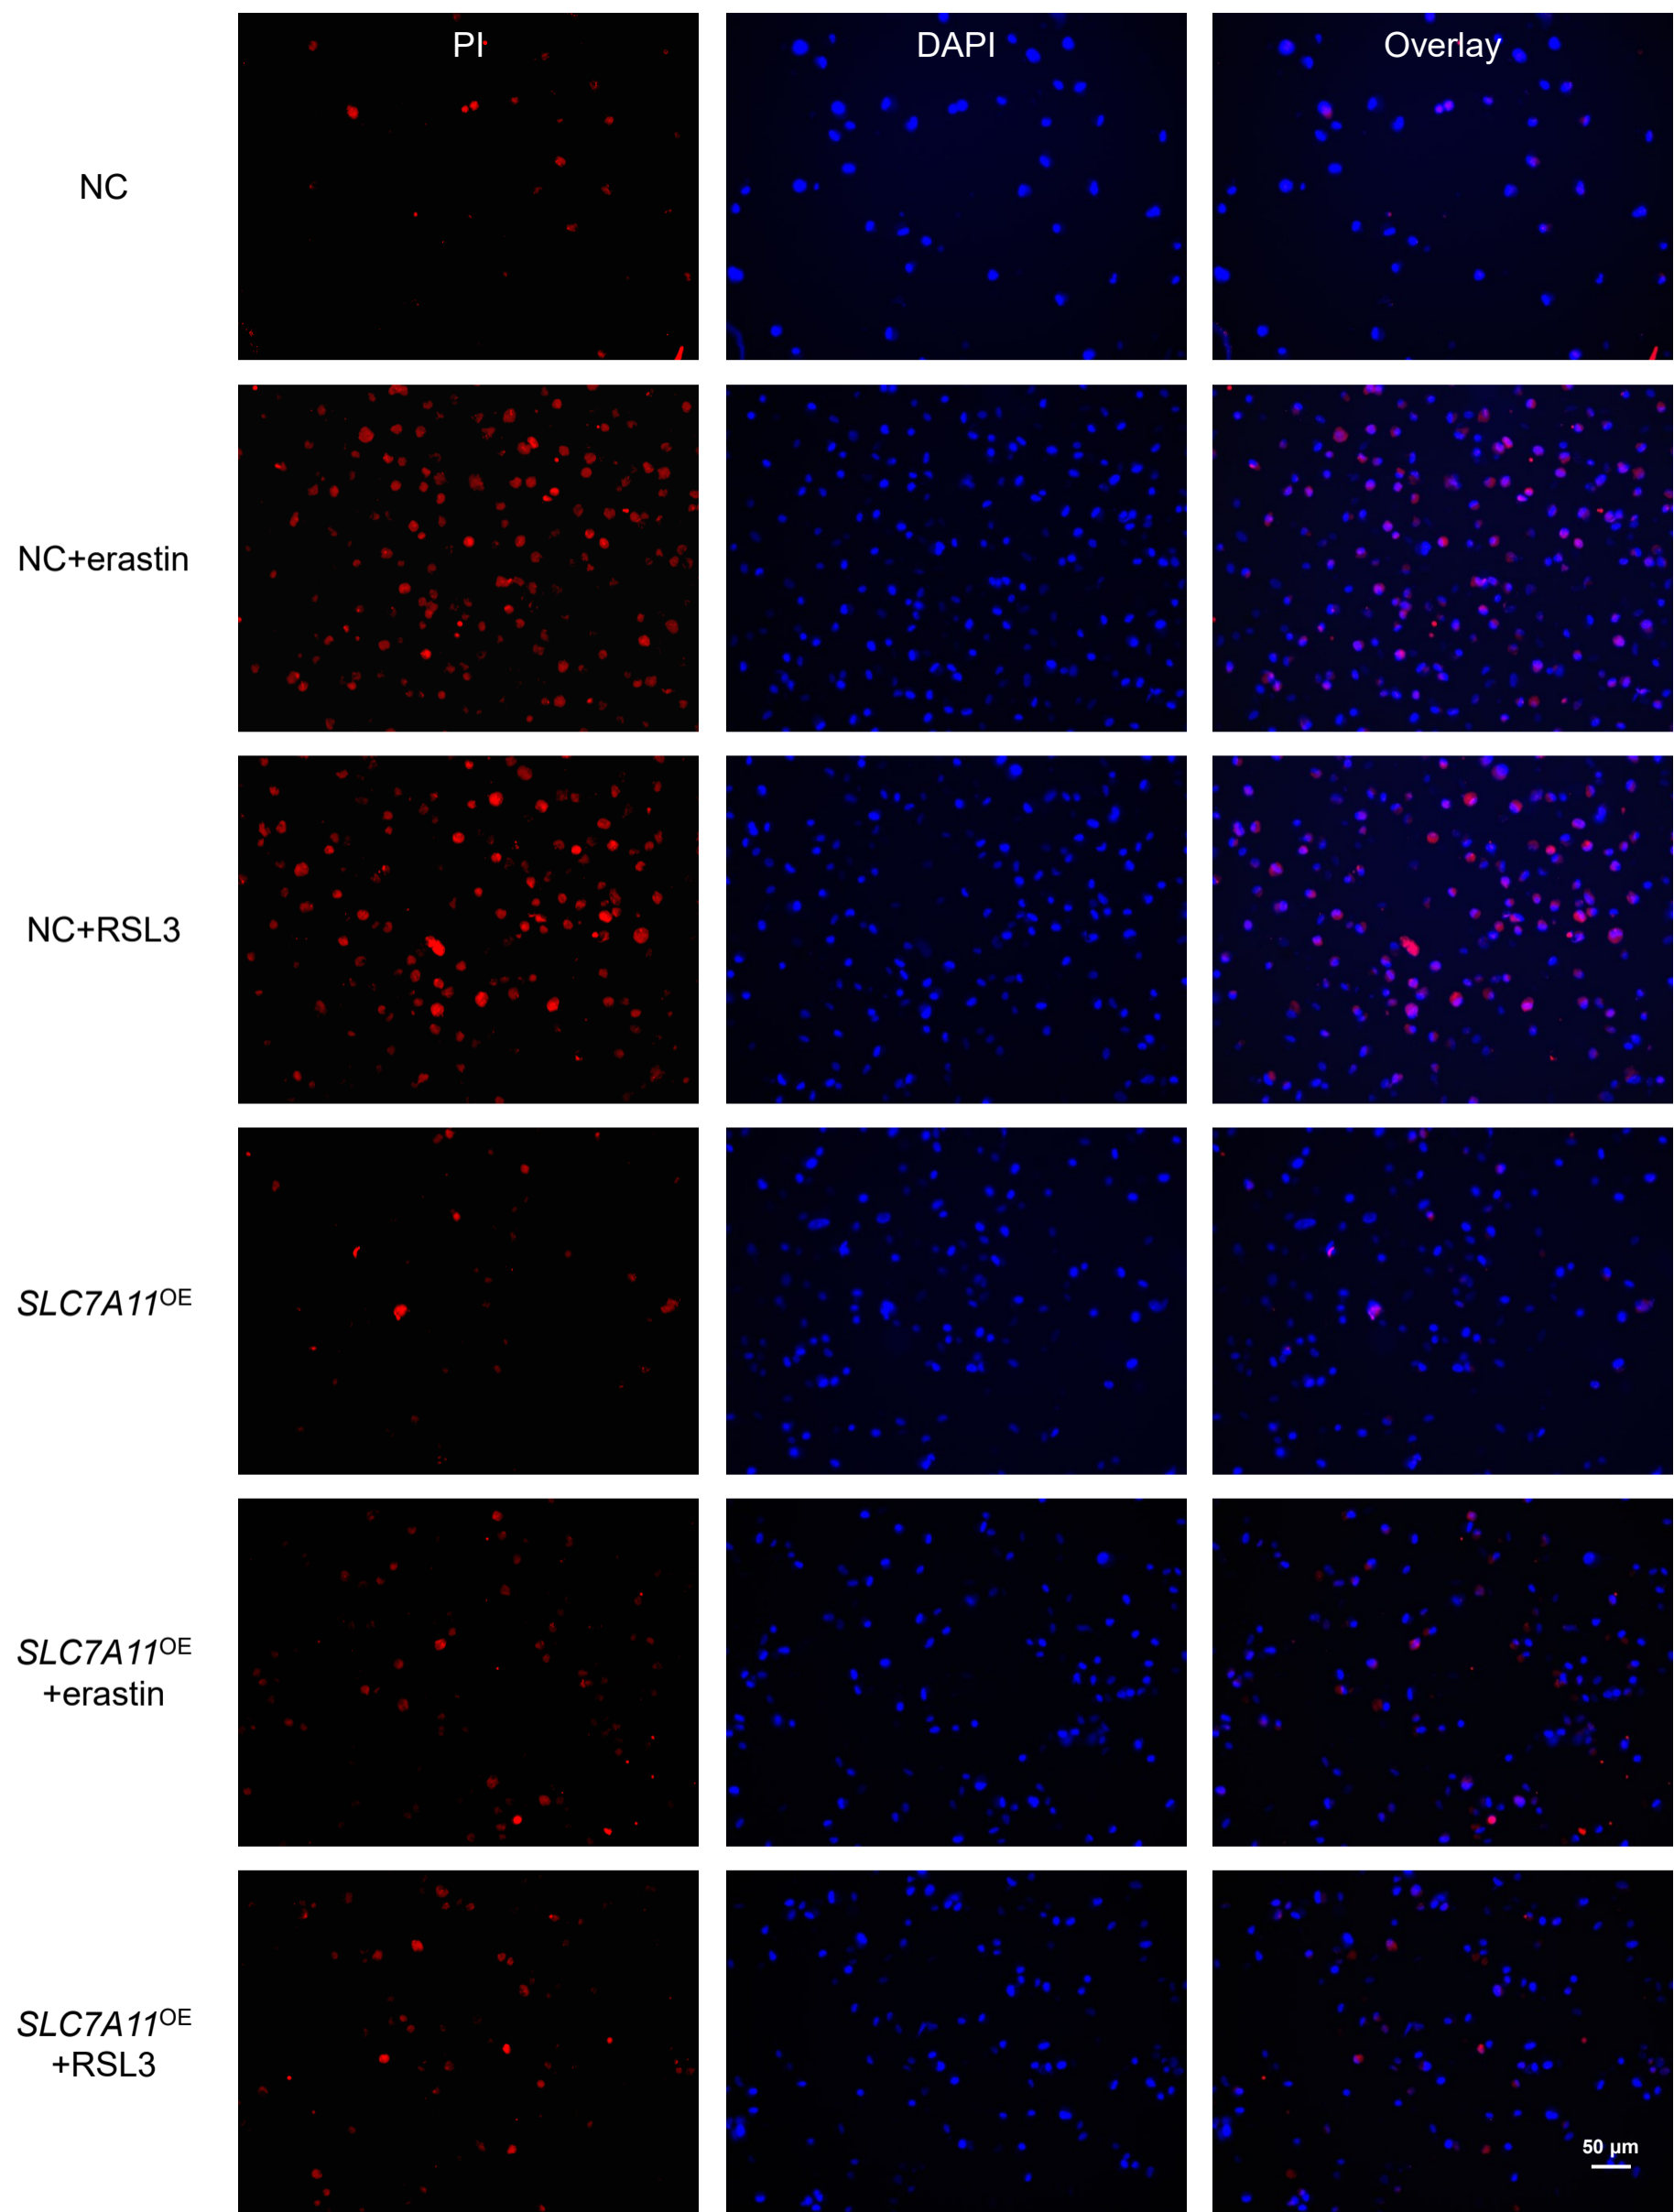

Supplement: Image_3.pdf [file Image_3.pdf]
